# Supplementary material for: Chiral induction in the crystallization of KIO3 and LiIO3: the role of amino acids in controlling the chirality of inorganic crystals
Source: Royal Society of Chemistry journal article supplement (doi:10.1039/d4na01006j), 2025-01-01
Supplement: d4na01006j1.pdf [file d4na01006j1.pdf]

## Supporting information

### Chiral induction in the crystallization of $\text{KIO}_3$ and $\text{LiIO}_3$ , the role of amino acids in controlling the chirality of inorganic crystals.

Matan Oliel,<sup>\*a</sup> and Yitzhak Mastai<sup>b</sup>

Department of Chemistry and Institute for Nanotechnology and Advanced Materials, Bar-Ilan University, Ramat Gan 5290002.

The following materials were purchased from Sigma Aldrich without any further purification:

| Material                 | CAS number |
|--------------------------|------------|
| L-Arginine               | 74-79-3    |
| D-Arginine               | 157-06-2   |
| L-Alanine                | 56-41-7    |
| D-Alanine                | 338-69-2   |
| $\text{KIO}_3$           | 7758-05-6  |
| $\text{HIO}_3$           | 7782-68-5  |
| $\text{Li}_2\text{CO}_3$ | 554-13-2   |
| LiOH                     | 1310-65-2  |
| L-Tartaric Acid          | 87-69-4    |
| D-Tartaric Acid          | 147-71-7   |
| DL-Tartaric Acid         | 133-37-9   |

S1: List of the materials that have been used in research.

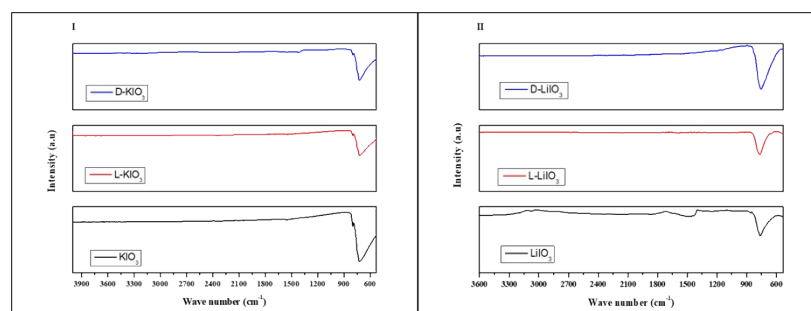

S2: FTIR spectra of  $\text{KIO}_3$  (I) and  $\text{LiIO}_3$  (II): control (black), L chiral induced (red) and D chiral induced (blue) crystals displaying the I-O vibration modes.

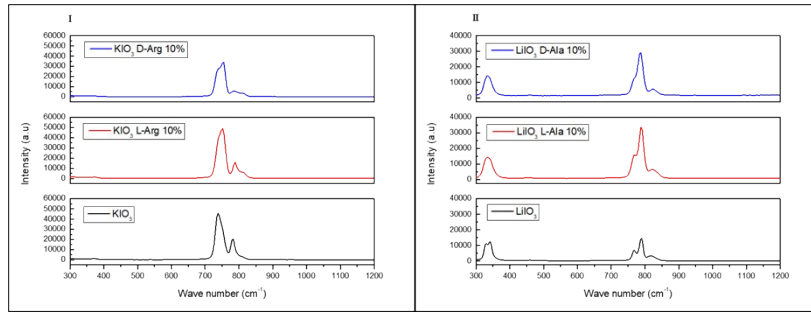

S3: Raman spectra of  $\text{KIO}_3$  (I) and  $\text{LiIO}_3$  (II): control (black), L chiral induced (red) and D chiral induced (blue) crystals displaying the I-O vibration modes and the free translational motion of the iodate anion.

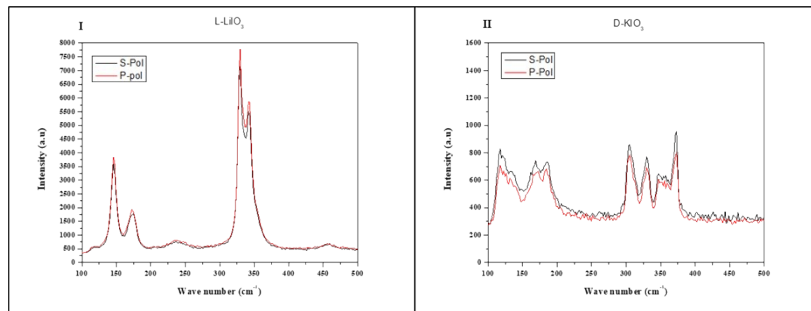

S4: Low Frequency Raman spectra of L- $\text{LiIO}_3$  (I) and D- $\text{KIO}_3$  (II): S-Polarization (black) and P-Polarization (red) displaying stronger signals at P-Polarization for L-induced  $\text{LiIO}_3$  crystals and stronger signals at S-Polarization for D-induced  $\text{KIO}_3$  crystals.
